# Supplementary material for: Chloroquine Triggers Cell Death and Inhibits PARPs in Cell Models of Aggressive Hepatoblastoma
Source: PubMed Central journal article supplement (PMC7379510; doi:10.3389/fonc.2020.01138), 2020-07-17
Supplement: Image_1.pdf [file Image_1.pdf]

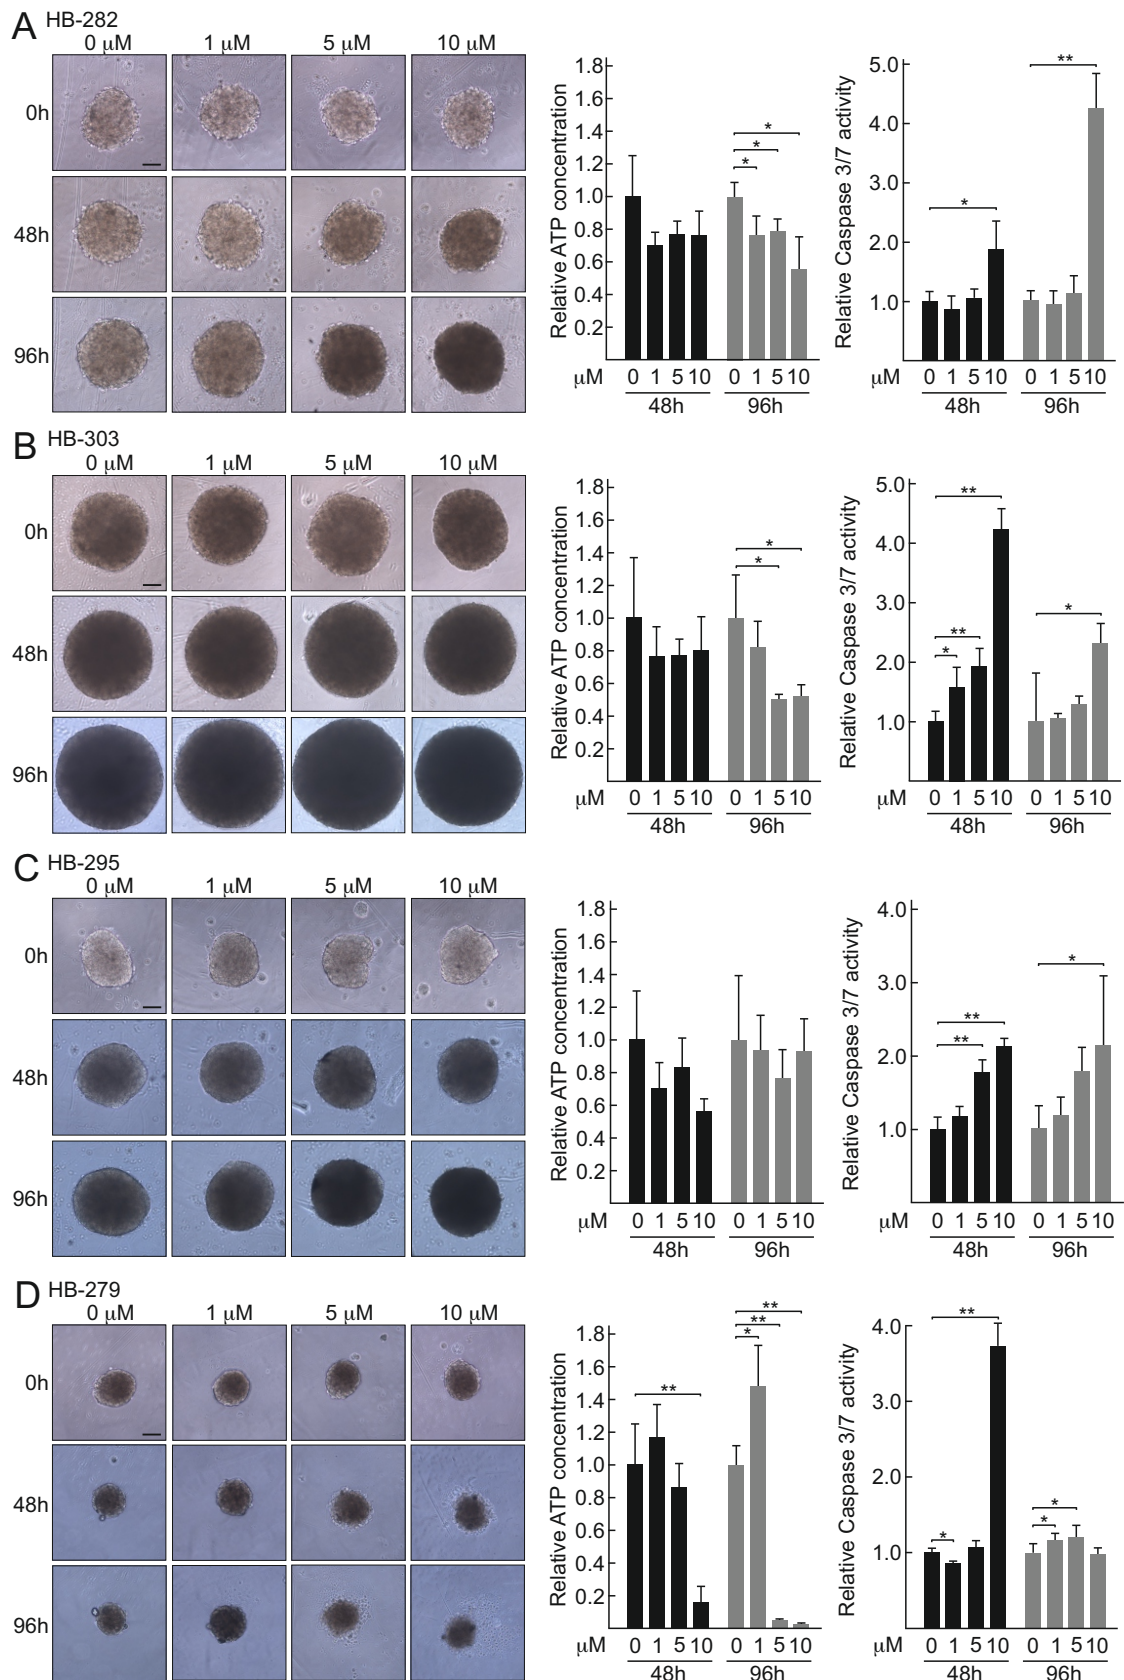

**Supplementary figure 1. Morphology, viability, and caspase 3/7 activation of HB spheroids treated with CQ.** Morphology, relative ATP concentration, and caspase activation of HB-282 (A), HB-303 (B), HB-295 (C), and HB-279 (D) derived spheroids treated with control medium (0 μM) or CQ at concentrations of 1 μM, 5 μM, and 10 μM. CQ concentrations; 1 μM, 5 μM, and 10 μM. \*P < 0.05. \*\*p < 0.01. Bar plots are presented as relative values of mean ± RSD (N = 3). Pictures were captured at initiation of treatment (0 h) and after 48 h and 96 h of CQ administration. Magnification 10x, scale bar = 10 μm.
