# Supplementary material for: Chloroquine Triggers Cell Death and Inhibits PARPs in Cell Models of Aggressive Hepatoblastoma
Source: PubMed Central journal article supplement (PMC7379510; doi:10.3389/fonc.2020.01138), 2020-07-17
Supplement: Image_2.pdf [file Image_2.pdf]

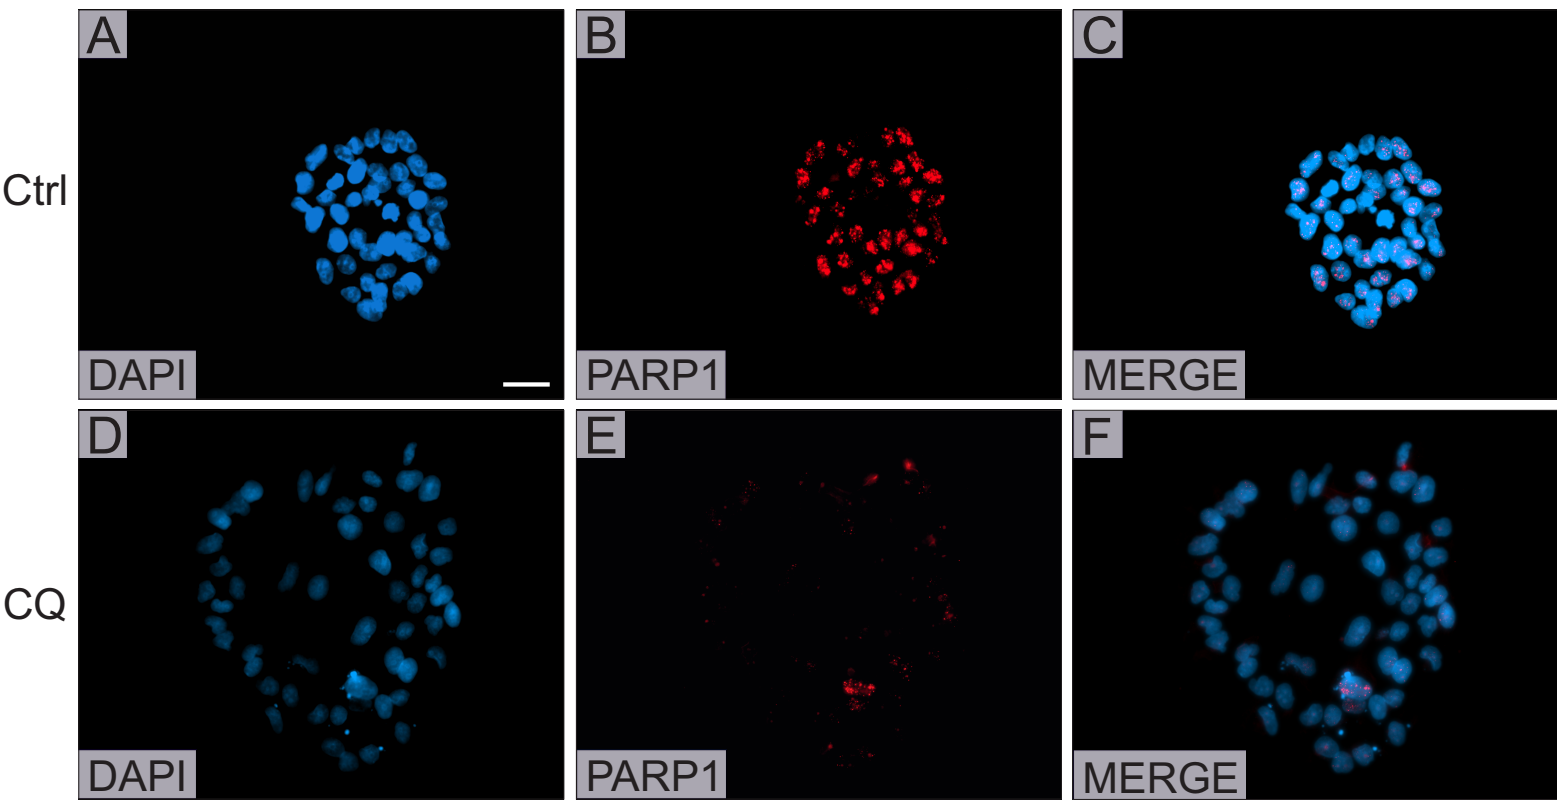

**Supplementary figure 2. CQ decreases nuclear PARP1 expression.** Immunofluorescence staining of PARP1 demonstrates decreased nuclear protein expression after 96 h CQ ( $5 \mu\text{M}$ ) treatment (D-F) compared to controls (A-C) in HUH6 cells. Scale bar =  $20 \mu\text{m}$ .
