# Supplementary material for: Chloroquine Triggers Cell Death and Inhibits PARPs in Cell Models of Aggressive Hepatoblastoma
Source: PubMed Central journal article supplement (PMC7379510; doi:10.3389/fonc.2020.01138), 2020-07-17
Supplement: Table_1.pdf [file Table_1.pdf]

**Supplementary table 1.** Clinical trials of CQ administration in oncology (clinicaltrials.gov, visited 8.4.2020).

| <b>NCT number</b> | <b>Title</b>                                                                                                    | <b>Status</b>  | <b>Study Results</b> | <b>Conditions</b>                                                                   | <b>Interventions</b>                                                                                      |
|-------------------|-----------------------------------------------------------------------------------------------------------------|----------------|----------------------|-------------------------------------------------------------------------------------|-----------------------------------------------------------------------------------------------------------|
| NCT01575782       | Chloroquine as an Anti-autophagic Radiosensitizing Drug in Stage I-III Small Cell Lung Cancer                   | Terminated     | No Results Available | Small Cell Lung Cancer                                                              | Drug: Chloroquine                                                                                         |
| NCT02333890       | A Phase 2 Randomized, Double-blind Trial Evaluating the Effects of Chloroquine in Breast Cancer                 | Unknown status | No Results Available | Breast Cancer, Invasive Breast Cancer                                               | Drugs: Chloroquine, Placebo                                                                               |
| NCT00969306       | Chloroquine as an Anti-Autophagy Drug in Stage IV Small Cell Lung Cancer (SCLC) Patients                        | Terminated     | No Results Available | Small Cell Lung Cancer                                                              | Drug: Chloroquine, A-CQ 100                                                                               |
| NCT01446016       | Chloroquine With Taxane Chemotherapy for Advanced or Metastatic Breast Cancer After Anthracycline Failure (CAT) | Completed      | No Results Available | Breast Neoplasms, Breast Cancer                                                     | Drugs: Taxane, Docetaxel, Abraxane, Ixabepilone                                                           |
| NCT02071537       | Chloroquine in Combination With Carboplatin/Gemcitabine in Advanced Solid Tumors                                | Completed      | No Results Available | Malignant Neoplasm, Solid Tumors                                                    | Drugs: Chloroquine, Carboplatin, Gemcitabine                                                              |
| NCT01777477       | Adjuvant Effect of Chloroquine on Gemcitabine                                                                   | Completed      | No Results Available | Pancreatic Cancer                                                                   | Drugs: Chloroquine, Gemcitabine                                                                           |
| NCT04333914       | Prospective Study in Patients With Advanced or Metastatic Cancer and SARS-CoV-2 (COVID-19) Infection            | Recruiting     | No Results Available | SARS-CoV-2 (COVID-19) Infection/Advanced or Metastatic Hematological or Solid Tumor | Drugs: Chloroquine analog (GNS651), Nivolumab, Tocilizumab; Other: Standard of care                       |
| NCT01023477       | Study of the Efficacy of Chloroquine in the Treatment of Ductal Carcinoma in Situ (The PINC Trial)              | Completed      | No Results Available | Carcinoma, Intraductal, Noninfiltrating Ductal Carcinoma In Situ                    | Drugs: Chloroquine Standard Dose (500mg/week), Chloroquine Low Dose (250mg/week, Procedure: Breast Biopsy |
| NCT02496741       | Metformin And Chloroquine in IDH1/2-mutated Solid Tumors                                                        | Completed      | No Results Available | Glioma, Cholangiocarcinoma, Chondrosarcoma                                          | Drugs: Metformin and chloroquine combination                                                              |
| NCT02786589       | Plasmodium Immunotherapy for Lung Cancer                                                                        | Recruiting     | No Results Available | Lung Cancer, Non-small Cell                                                         | Biological: Blood-stage infection of <i>P. vivax</i>                                                      |
| NCT01894633       | Study of Whole-brain Irradiation With Chloroquine for Brain Metastases                                          | Terminated     | No Results Available | Brain Metastasis                                                                    | Drug: Chloroquine; Radiation: Total brain radiotherapy                                                    |
| NCT01727531       | IDO2 Genetic Status Informs the Neoadjuvant Efficacy of Chloroquine (CQ) in Brain Metastasis Radiotherapy       | Completed      | No Results Available | Brain Metastasis                                                                    | Drug: Chloroquine diphosphate                                                                             |

|             |                                                                                                                                  |                    |                      |                                                                                                                                                                            |                                                                                                                                                                                                                                           |
|-------------|----------------------------------------------------------------------------------------------------------------------------------|--------------------|----------------------|----------------------------------------------------------------------------------------------------------------------------------------------------------------------------|-------------------------------------------------------------------------------------------------------------------------------------------------------------------------------------------------------------------------------------------|
| NCT01438177 | Chloroquine in Combination With VELCADE and Cyclophosphamide for Relapsed and Refractory Multiple Myeloma                        | Terminated         | Has Results          | Multiple Myeloma                                                                                                                                                           | Drug: Velcade, Cyclophosphamide, Chloroquine                                                                                                                                                                                              |
| NCT01469455 | DNA Repair Inhibitor & Irradiation on Melanoma                                                                                   | Completed          | No Results Available | Local Metastatic Melanoma                                                                                                                                                  | Drug: DT01                                                                                                                                                                                                                                |
| NCT03243461 | International Cooperative Phase III Trial of the HIT-HGG Study Group (HIT-HGG-2013)                                              | Recruiting         | No Results Available | Glioblastoma WHO Grade IV, Diffuse Midline Glioma Histone 3 K27M WHO Grade IV, Anaplastic Astrocytoma WHO Grade III, Diffuse Intrinsic Pontine Glioma, Gliomatosis Cerebri | Drugs: Temozolomide + Valproic Acid, Temozolomide + Chloroquine                                                                                                                                                                           |
| NCT02366884 | Clinical Evaluation of a New Form of Cancer Therapy Based on the Principles of Atavistic Metamorphosis (Atavistic Chemotherapy). | Recruiting         | No Results Available | Neoplasms                                                                                                                                                                  | Drugs: Anti-Bacterial Agents, Anti-Fungal Agents, Anti-Protozoal Agents                                                                                                                                                                   |
| NCT02378532 | The Addition of Chloroquine to Chemoradiation for Glioblastoma                                                                   | Completed          | No Results Available | Glioblastoma Multiforme                                                                                                                                                    | Drugs: Chloroquine, Temozolomide; Radiation: Radiotherapy                                                                                                                                                                                 |
| NCT02432417 | The Addition of Chloroquine to Chemoradiation for Glioblastoma                                                                   | Not yet recruiting | No Results Available | Glioblastoma, Astrocytoma, Grade IV                                                                                                                                        | Drug: Chloroquine                                                                                                                                                                                                                         |
| NCT00224978 | Chloroquine for Treatment of Glioblastoma Multiforme                                                                             | Completed          | No Results Available | Glioblastoma Multiforme                                                                                                                                                    | Drug: Chloroquine                                                                                                                                                                                                                         |
| NCT03400865 | Cabergoline Combined Hydroxychloroquine/Chloroquine to Treat Resistant Prolactinomas                                             | Not yet recruiting | No Results Available | Resistance, Disease; Prolactinoma                                                                                                                                          | Drugs: HCQ/CQ and CAB combined treatment                                                                                                                                                                                                  |
| NCT03979651 | MEK and Autophagy Inhibition in Metastatic/Locally Advanced, Unresectable Neuroblastoma RAS (NRAS) Melanoma                      | Not yet recruiting | No Results Available | Metastatic NRAS Melanoma                                                                                                                                                   | Drugs: Trametinib plus hydroxychloroquine in patients with NRAS Melanoma (Dose 1), Trametinib plus hydroxychloroquine in patients with NRAS Melanoma (Dose 2), Trametinib plus hydroxychloroquine in patients with NRAS Melanoma (Dose 3) |
